# Supplementary material
Source: MDPI journal article supplement (https://www.mdpi.com/2409-515X/8/4/66)
Supplement: s1 [file s1]

**Table S1.** Proportions of single metabolites and ratios above cutoff limits, and results from applying algorithms according to the Austrian and Heidelberg NBS for cases and controls (n, %).

|                                        | Clinical cases<br>(n=70) | Clinical cases<br>with B12<160<br>or holoTC<35<br>pmol/L (n=30) | Matched<br>controls<br>(n=646) | Un-matched<br>controls<br>(n=434) |
|----------------------------------------|--------------------------|-----------------------------------------------------------------|--------------------------------|-----------------------------------|
| C3>97p (4.0 µmol/L)                    | 1 (1.4%)                 | 1 (3.3%)                                                        | 9 (1.4%)                       | 28 (6.5%)                         |
| C3>99p (4.9 µmol/L)                    | 1 (1.4%)                 | 1 (3.3%)                                                        | 4 (0.6%)                       | 10 (2.3%)                         |
| MET<5p (11.7 µmol/L)                   | 5 (7.1%)                 | 3 (10%)                                                         | 39 (6.0%)                      | 43 (10%)                          |
| MET<0.59p (8.9 µmol/L)                 | 1 (1.4%)                 | 1 (3.3%)                                                        | 6 (0.9%)                       | 8 (1.8%)                          |
| MET/PHE<1.75p (0.21)                   | 3 (4.3%)                 | 2 (6.7%)                                                        | 21 (3.3%)                      | 21 (4.8%)                         |
| MET/PHE<5p (0.23)                      | 5 (7.1%)                 | 4 (13%)                                                         | 39 (6.0%)                      | 34 (7.8%)                         |
| MET/PHE>89p (0.44)                     | 5 (7.1%)                 | 3 (10%)                                                         | 31 (4.8%)                      | 13 (3.0%)                         |
| C3/C0>99.3p (0.29)                     | 0                        | 0                                                               | 5 (0.8%)                       | 11 (2.5%)                         |
| C3/C2>99.5p (0.21)                     | 1 (1.4%)                 | 1 (3.3%)                                                        | 1 (0.2%)                       | 4 (0.9%)                          |
| C3/C2>99.9p (0.25)                     | 0                        | 0                                                               | 1 (0.2%)                       | 0                                 |
| C3/C16>99.2p (1.63)                    | 2 (2.9%)                 | 1 (3.3%)                                                        | 6 (0.9%)                       | 1 (0.2%)                          |
| C3/MET>97p (0.24)                      | 3 (4.3%)                 | 2 (6.7%)                                                        | 11 (1.7%)                      | 41 (9.4%)                         |
| tHcy>6.3 µmol/L                        | 33 (47%)                 | 17 (57%)                                                        | 195 (30%)                      | 46 (11%)                          |
| tHcy>8.6 µmol/L                        | 13 (19%)                 | 7 (23%)                                                         | 60 (9.3%)                      | 14 (3.2%)                         |
| MMA>0.423 µmol/L                       | 10 (14%)                 | 4 (13%)                                                         | 22 (3.4%)                      | 115 (26%)                         |
| MMA>2.35 µmol/L                        | 1 (1.4%)                 | 0                                                               | 1 (0.2%)                       | 0                                 |
| MCA>0.34 µmol/L                        | 2 (2.9%)                 | 1 (3.3%)                                                        | 31 (4.8%)                      | 7 (1.6%)                          |
| Heidelberg Met pathway                 | 12 (17%)                 | 8 (27%)                                                         | 89 (14%)                       | 72 (17%)                          |
| Heidelberg Met pathway and<br>tHcy>8.6 | 3 (4.3%)                 | 3 (10%)                                                         | 4 (0.6%)                       | 1 (0.2%)                          |

|                                   |           |           |           |            |
|-----------------------------------|-----------|-----------|-----------|------------|
| Heidelberg C3 pathway             | 1 (1.4%)  | 1 (3.3%)  | 4 (0.6%)  | 14 (3.2%)  |
| Heidelberg C3 pathway and MMA/MCA | 0         | 0         | 0         | 2 (0.5%)   |
| Austrian low C3 pathway           | 1 (1.4%)  | 1 (3.3%)  | 6 (0.9%)  | 15 (3.5%)  |
| Austrian low C3 and tHcy>6.3      | 1 (1.4%)  | 1 (3.3%)  | 3 (0.5%)  | 1 (0.2%)   |
| Austrian low C3 and tHcy>8.6      | 0         | 0         | 1 (0.2%)  | 1 (0.2%)   |
| Austrian high C3 pathway          | 1 (1.4%)* | 1 (3.3%)* | 4 (0.6%)* | 10 (2.3%)* |
| Austrian high C3 and tHcy>6.3     | 1 (1.4%)* | 1 (3.3%)* | 2 (0.3%)* | 1 (0.2%)*  |
| Austrian high C3 and tHcy>8.6     | 0         | 0         | 1 (0.2%)* | 1 (0.2%)*  |
| Austrian Met pathway              | 3 (4.3%)  | 2 (6.7%)  | 23 (3.6%) | 24 (5.5%)  |
| Austrian Met and tHcy>6.3         | 1 (1.3%)  | 1 (3.3%)  | 4 (0.6%)  | 0          |
| Austrian Met and tHcy>8.6         | 0         | 0         | 0         | 0          |

\*=overlapping with low C3 pathway, Met=methionine, Phe=phenylalanine, C0=carnitine, C2=acetylcarnitine, C3=propionylcarnitine,

C16=palmitoylcarnitine, tHcy=total homocysteine, MMA=methylmalonic acid, MCA=methylcitric acid.
