# Supplementary material
Source: MDPI journal article supplement (https://www.mdpi.com/2409-515X/8/4/66)
Supplement: s1 [file s1]

**Figure S1.** Results from applying the Austrian and Heidelberg algorithms for B12 deficiency on 70 clinical cases (black) and on a subgroup (orange) with s-vitamin B12<160 pmol/L or s-holotranscobalamin<35 pmol/L. Cutoffs in percentiles except for C3>10 µmol/L, ratios in %. Met=methionine, Phe=phenylalanine, C0=carnitine, C2=acetylcarnitine, C3=propionylcarnitine, C16=palmitoylcarnitine, tHcy=total homocysteine, MMA=methylmalonic acid, B12D=vitamin B12 deficiency. Adapted from (5,6).
