# Supplementary material
Source: MDPI journal article supplement (https://www.mdpi.com/2409-515X/8/4/66)

## Austrian algorithm

## Heidelberg algorithm

1<sup>st</sup> tiers

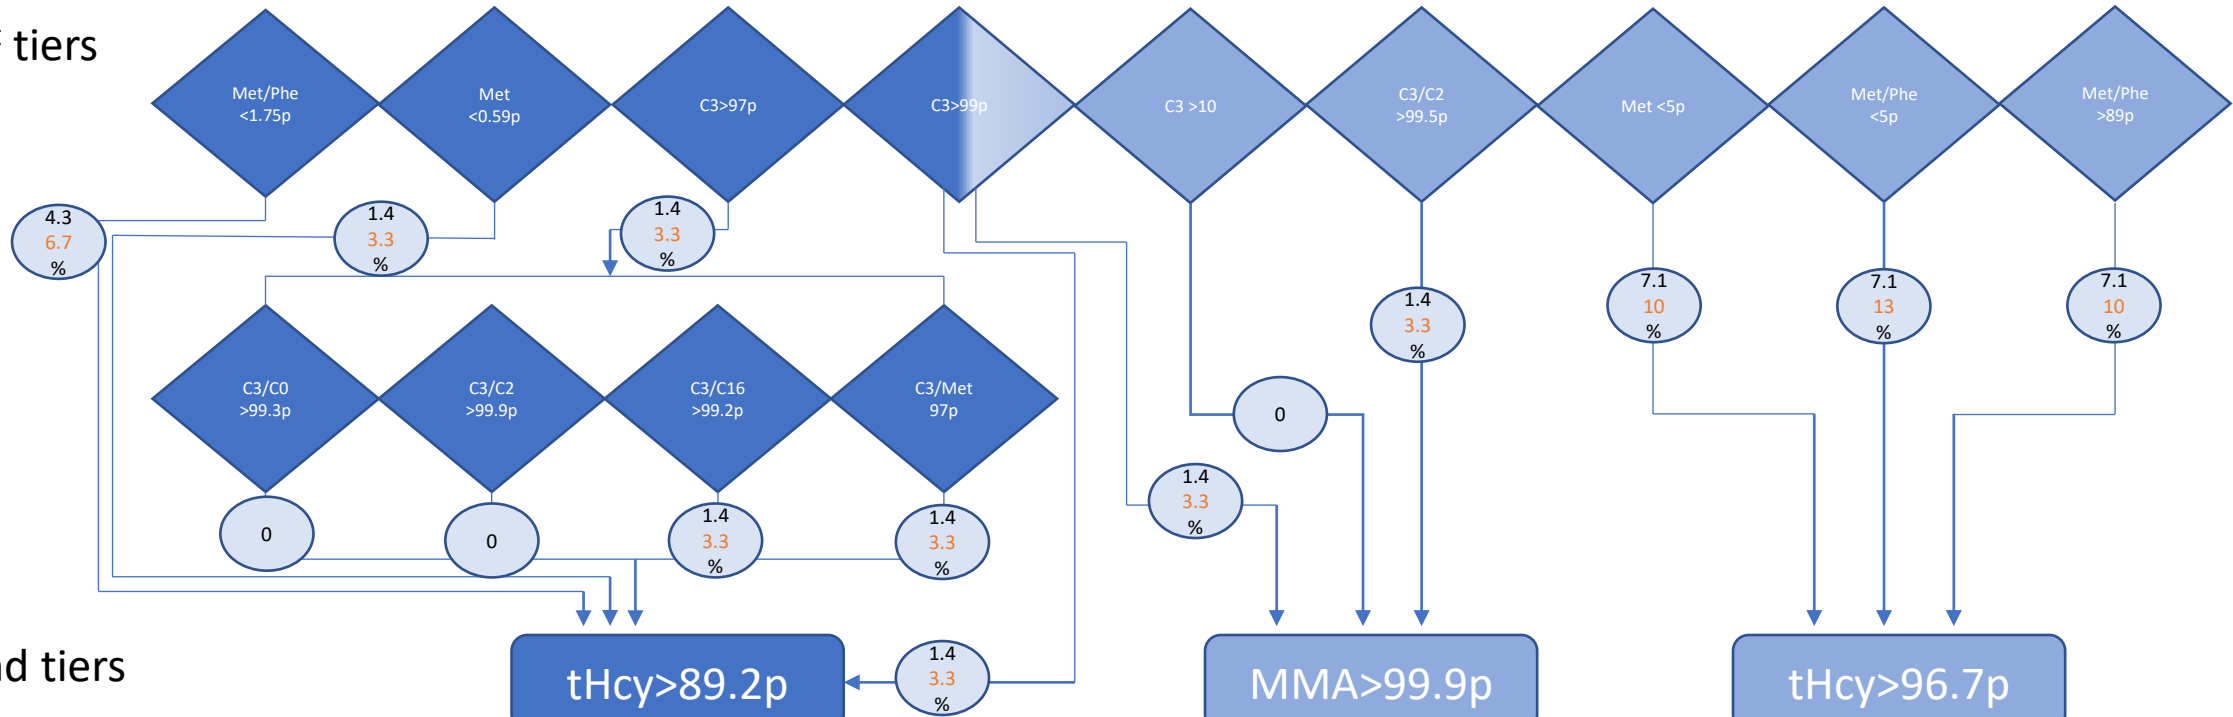

2<sup>nd</sup> tiers

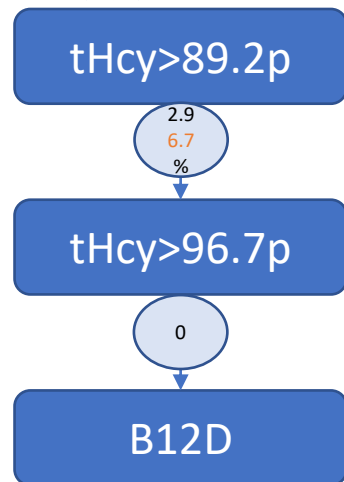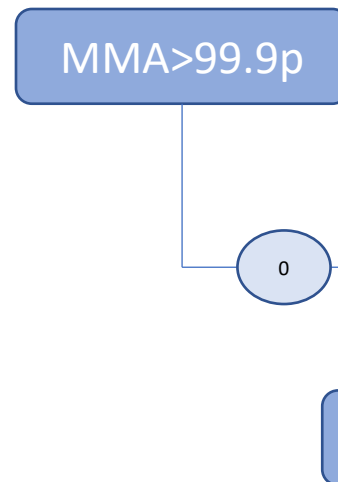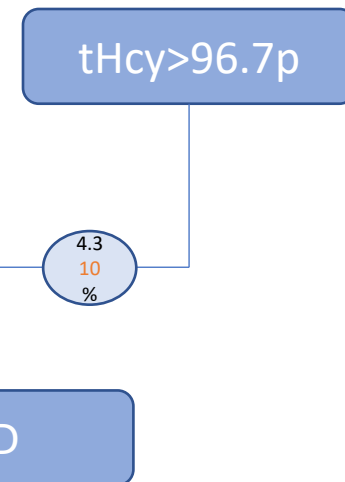

Supplement: s1 [file s1]
